# Supplementary material for: An equivariant generative framework for molecular graph-structure Co-design
Source: Royal Society of Chemistry journal article supplement (doi:10.1039/d3sc02538a), 2023-01-01
Supplement: d3sc02538a1.pdf [file d3sc02538a1.pdf]

473 **1 Supplementary Information**

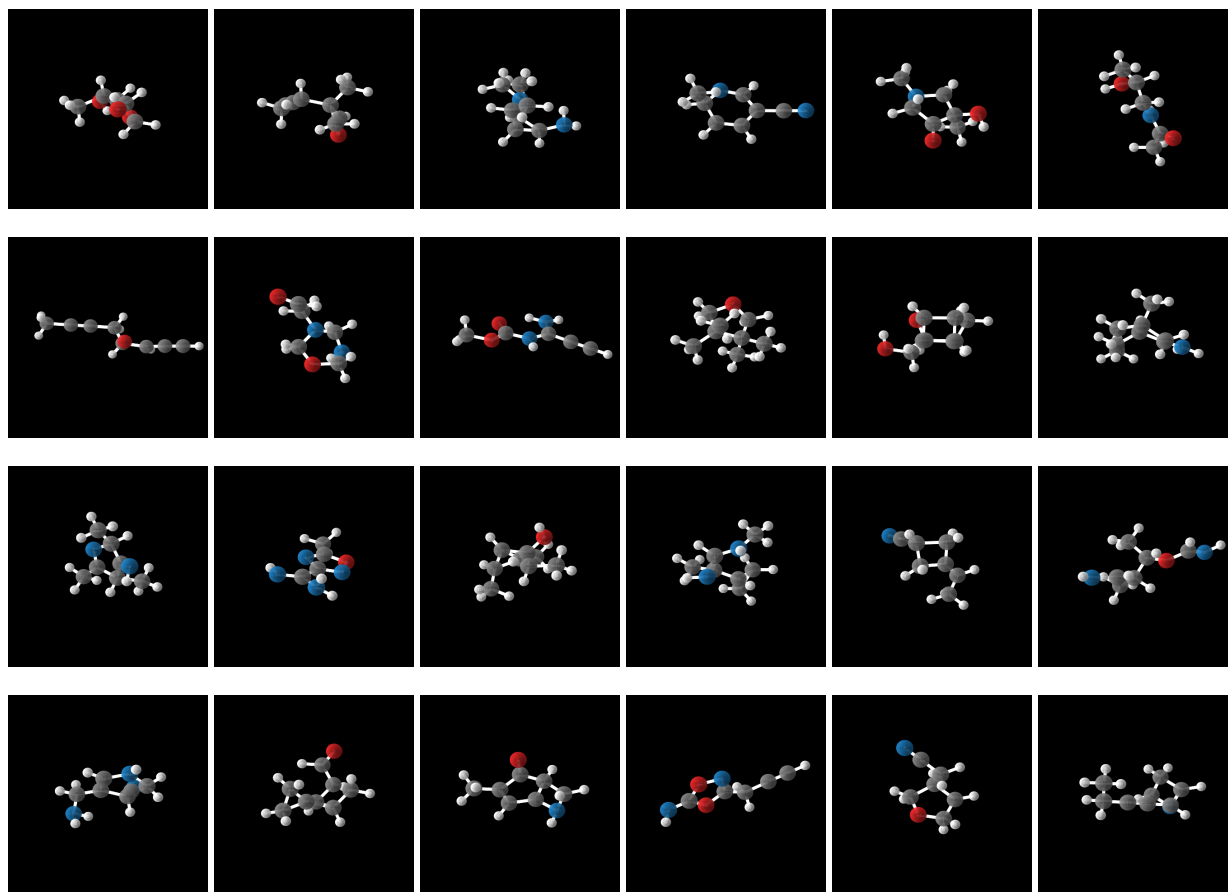

**Figure S1.** Randomly sampled molecules generated by MolCode trained on QM9.

**Table S1. Substructure analysis of the generated molecules.** The KL divergence of the bond lengths (upper part) and bond angles (lower part) between the training set and the generated molecules are shown below.

| Distances/Angles | E-NFs <sup>60</sup> | G-SchNet <sup>24</sup> | G-SphereNet <sup>43</sup> | EDM <sup>42</sup> | MolCode (w/o bond) | MolCode     |
|------------------|---------------------|------------------------|---------------------------|-------------------|--------------------|-------------|
| CC               | 0.53                | 0.44                   | 0.30                      | 0.36              | 0.32               | <b>0.24</b> |
| CN               | 0.87                | 0.68                   | 0.45                      | 0.37              | 0.43               | <b>0.30</b> |
| CO               | 0.49                | 0.32                   | 0.24                      | 0.26              | 0.25               | <b>0.21</b> |
| NO               | 0.39                | 0.27                   | 0.20                      | 0.24              | 0.19               | <b>0.17</b> |
| CCC              | 1.25                | 0.96                   | 0.65                      | 0.48              | 0.66               | <b>0.25</b> |
| CCO              | 0.98                | 0.85                   | 0.41                      | 0.33              | 0.47               | <b>0.23</b> |
| CNC              | 1.44                | 1.37                   | 0.71                      | 0.56              | 0.64               | <b>0.42</b> |
| CCN              | 1.30                | 0.95                   | 0.74                      | 0.84              | 0.62               | <b>0.37</b> |

**Table S2.** Properties of the test set molecules and the generated molecules by different methods in structure-based drug design (the upper part shows the results of baselines and the test set; the lower part shows MolCode and its variants). We report the means and standard deviations. The best results are bolded.

| Method                   | Vina Score<br>(kcal/mol, ↓) | High<br>Affinity(↑) | QED (↑)           | SA (↑)            | LogP        | Lip. (↑)          | Sim. (↓)          | Div. (↑)          |
|--------------------------|-----------------------------|---------------------|-------------------|-------------------|-------------|-------------------|-------------------|-------------------|
| Testset                  | -7.143±1.76                 | -                   | 0.477±0.18        | 0.642±0.17        | 0.924±2.06  | 4.443±1.18        | -                 | -                 |
| LiGAN <sup>74</sup>      | -6.184±0.96                 | 0.146±0.16          | 0.240±0.17        | 0.482±0.13        | -0.125±2.48 | 4.146±1.29        | 0.412±0.17        | 0.580±0.09        |
| AR <sup>44</sup>         | -6.237±1.24                 | 0.188±0.18          | 0.581±0.13        | 0.640±0.17        | 0.232±1.78  | 4.662±0.54        | 0.423±0.18        | 0.733±0.11        |
| GraphBP <sup>46</sup>    | -6.368±1.65                 | 0.236±0.15          | 0.454±0.20        | 0.459±0.18        | 0.512±2.13  | 4.574±0.44        | 0.413±0.11        | 0.687±0.15        |
| Pocket2Mol <sup>47</sup> | -7.206±1.82                 | 0.544±0.14          | 0.649±0.16        | 0.704±0.18        | 1.134±1.88  | 4.905±0.14        | 0.388±0.21        | 0.650±0.16        |
| MolCode                  | <b>-7.412±1.74</b>          | <b>0.618±0.15</b>   | <b>0.652±0.19</b> | <b>0.708±0.16</b> | 1.225±2.16  | <b>4.924±0.08</b> | <b>0.371±0.20</b> | <b>0.693±0.14</b> |
| w/o check                | -7.076±1.48                 | 0.472±0.13          | 0.663±0.15        | 0.664±0.15        | 1.054±1.85  | 4.912±0.12        | 0.382±0.19        | 0.686±0.12        |
| w/o bond                 | -6.895±1.67                 | 0.414±0.14          | 0.620±0.17        | 0.642±0.13        | 0.926±1.93  | 4.829±0.18        | 0.390±0.21        | 0.676±0.16        |

474 In Table.S2, we show more qualitative evaluations of the generated ligand molecules in structure-based drug design. We  
475 choose metrics that are widely used in previous works<sup>44,46,47</sup> to evaluate the qualities of the sampled molecules: (1) **Vina Score**  
476 measures the binding affinity between the generated molecules and the protein pockets; (2) **High Affinity** is calculated as the  
477 percentage of pockets whose generated molecules have higher affinity to the references in the test set; (3) **QED**<sup>68</sup> measures how  
478 likely a molecule is a potential drug candidate; (4) **Synthesizability (SA)** represents the difficulty of drug synthesis (the score is  
479 normalized between 0 and 1 and higher values indicate easier synthesis); (5) **LogP** is the octanol-water partition coefficient  
480 (LogP values should be between -0.4 and 5.6 to be good drug candidates<sup>82</sup>); (6) **Lipinski (Lip.)** calculates how many rules the  
481 molecule obeys the Lipinski’s rule of five<sup>83</sup>; (7) **Sim.** represents the Tanimoto similarity<sup>84</sup> with the most similar molecules in  
482 the training set; (8) **Diversity (Div.)** measures the diversity of generated molecules for a binding pocket (It is calculated as 1 -  
483 average pairwise Tanimoto similarities). In our work, The Vina Score is calculated by QVina<sup>69,70</sup> and the chemical properties  
484 are calculated by RDKit<sup>71,72</sup> over the valid molecules. Before feeding to Vina, all the generated molecular structures are firstly  
485 refined by universal force fields<sup>73</sup>. To sample molecules, we apply 5 independent runs with random seeds.

**Table S3. Results of random molecule generation on GEOM-Drugs.** We follow the preprocessing procedure in previous work<sup>76</sup>. Validity calculates the percentage of valid molecules among all the generated molecules; Uniqueness refers to the percentage of unique molecules among the valid molecules; Novelty measures the fraction of molecules not in the training set among all the valid and unique molecules. Time records the sampling time for 10,000 molecules. The best results are bolded.

| Method                    | Validity      | Uniqueness     | Novelty        | Time        |
|---------------------------|---------------|----------------|----------------|-------------|
| G-SphereNet <sup>43</sup> | 39.16%        | 96.45%         | 98.70%         | <b>2746</b> |
| EDM <sup>42</sup>         | 44.71%        | <b>100.00%</b> | <b>100.00%</b> | 25284       |
| MolCode (w/o check)       | 72.30%        | 98.75%         | 97.43%         | 3162        |
| MolCode (w/o bond)        | 63.46%        | 98.14%         | 98.77%         | 3488        |
| MolCode                   | <b>98.82%</b> | <b>100.00%</b> | <b>100.00%</b> | 3950        |

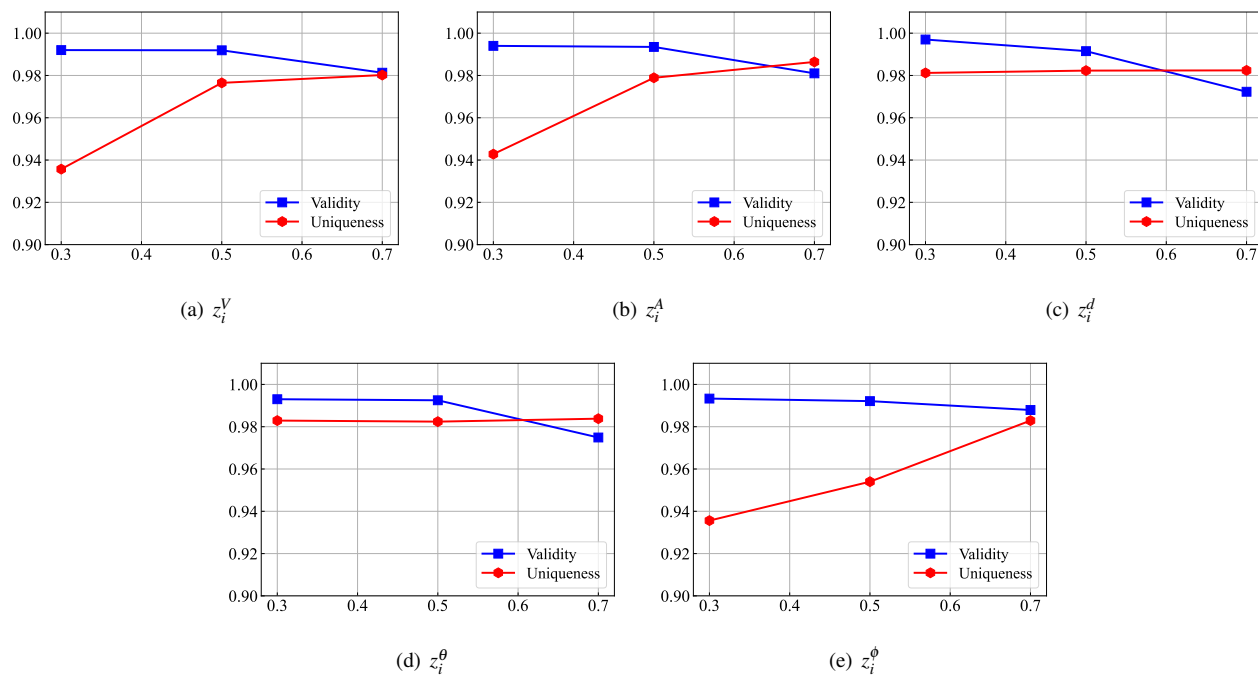

**Figure S2.** Influence of temperature hyperparameters on Validity and Uniqueness in the random molecule generation task.

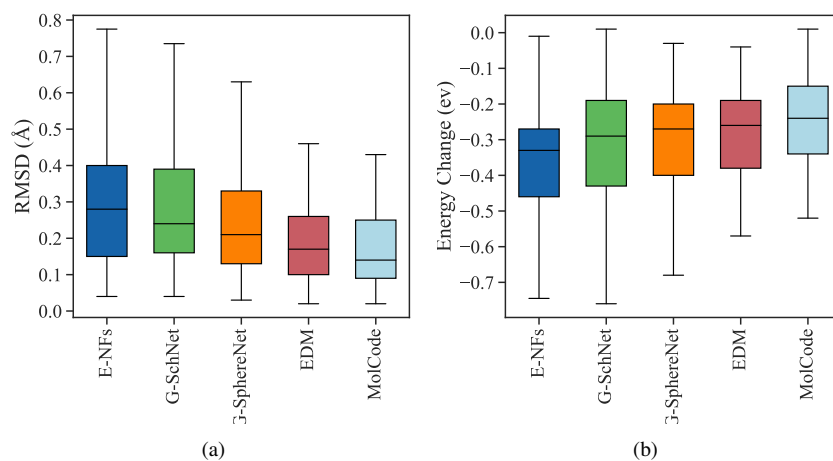

**Figure S3.** (a) The RMSD of the atomic positions between the generated and the corresponding relaxed molecules with force fields. Following previous works on molecular conformation generation<sup>38,85</sup>, we use the empirical force field<sup>86</sup> to optimize molecular conformations. (b) The internal energy change between the generated and the corresponding relaxed molecules ( $E_{relaxed} - E_{generated}$ ). Following cG-SchNet<sup>26</sup> and G-SchNet<sup>24</sup>, we use the pretrained SchNet<sup>87</sup> models from SchNetPack<sup>88</sup> to predict the internal energy at zero Kelvin of generated molecules.

---

**Algorithm 1** Training Algorithm of MolCode

---

**Input:** Molecular dataset  $\mathcal{M}$ , learning rate  $\eta$ , Adam hyperparameters  $\beta_1, \beta_2$ , batch size  $B$ , GoGen model with trainable parameter  $w$ , latent distribution  $p_{Z_V}, p_{Z_A}, p_{Z_d}, p_{Z_\theta}, p_{Z_\phi}$ , maximum number of atoms  $n$

**Initial:** Parameters  $w$  of MolCode

```
1: while  $w$  is not converged do
2:   Sample a batch of  $B$  molecule  $mol$  from dataset  $\mathcal{M}$ 
3:    $L = 0$ 
4:   for  $G \in mol$  do
5:     Set  $n$  as the number of atoms in  $G$  and order the atoms in  $G$ 
6:     for  $i = 1, \dots, n - 1$  do
7:       Get  $V_i, d_i, \theta_i$  (if  $i \geq 2$ ),  $\phi_i$  (if  $i \geq 3$ ) and the reference atoms  $(f, c, e)$ 
8:       Get  $z_i^V, z_i^d, z_i^\theta$  (if  $i \geq 2$ ),  $z_i^\phi$  (if  $i \geq 3$ ) with the flow modules in MolCode
9:        $L = L - \log p_{Z_V}(z_i^V) - \log p_{Z_d}(z_i^d)$ 
10:       $L = L - \log p_{Z_V}(z_i^\theta)$  (if  $i \geq 2$ )
11:       $L = L - \log p_{Z_V}(z_i^\phi)$  (if  $i \geq 3$ )
12:      for  $j \in \{f, c, e\}$  do
13:        Get  $A_{ij}$  and  $z_{ij}^A$ 
14:         $L = L - \log p_{Z_A}(z_{ij}^A)$ 
15:      end for
16:      Add the binary cross entropy loss for the focal atom selection to  $L$ 
17:    end for
18:  end for
19:   $w \leftarrow \text{ADAM}(\frac{L}{B}, w, \eta, \beta_1, \beta_2)$ 
20: end while
```

---

---

**Algorithm 2** Generation Algorithm of MolCode

---

**Input:** GoGen model with parameter  $w$ , latent distribution  $p_{Z_V}, p_{Z_A}, p_{Z_d}, p_{Z_\theta}, p_{Z_\phi}$ , maximum number of atoms  $n$ , maximum number of trials to sample bond types  $T$

```
1: for  $i = 1, \dots, n - 1$  do
2:   Initialize molecular graph  $G_1$  with one carbon atom, whose coordinate is  $R_0 = [0, 0, 0]$ 
3:   Sample  $z_i^V \sim p_{Z_V}$  and generate  $V_i$ 
4:   Get the candidate focal atom set by the atom-wise classifier
5:   Get the reference atoms  $\{f, c, e\}$ 
6:   for  $j \in \{f, c, e\}$  do
7:     Count = 0
8:     Get  $z_{ij}^A \sim p_{Z_A}$  and generate  $A_{ij}$ 
9:     if  $\sum_j |A_{ij}| \geq \text{Valency}(X_i)$  or  $\sum_i |A_{ij}| \geq \text{Valency}(X_j)$  and Count  $\leq T$  then
10:      Reject  $A_{ij}$  and sample a new  $z_{ij}^A$ ; Count+=1
11:    else
12:      Assign no bond to  $A_{ij}$ 
13:    end if
14:  end for
15:  if the candidate focal atom set is empty or  $\sum_j |A_{ij}| = 0$  then
16:    Output  $G_i$ 
17:  else
18:    Random select the focal atom  $f$  from the candidate focal atom set
19:  end if
20:  Sample  $z_i^d, z_i^\theta$  (if  $i \geq 2$ ),  $z_i^\phi$  (if  $i \geq 3$ )
21:  Generate  $d_i, \theta_i$  (if  $i \geq 2$ ),  $\phi_i$  (if  $i \geq 3$ ) and get  $R_i$ , update  $G_i$  to  $G_{i+1}$ 
22: end for
23: Output  $G_n$ 
```

---

## References (note this is the full reference list - not all are cited in the supplementary information)

1. Hajduk, P. J. & Greer, J. A decade of fragment-based drug design: strategic advances and lessons learned. *Nature reviews Drug discovery* **6**, 211–219 (2007).
2. Lawson, A. D. Antibody-enabled small-molecule drug discovery. *Nature Reviews Drug Discovery* **11**, 519–525 (2012).
3. Wang, Y., Wang, J., Cao, Z. & Barati Farimani, A. Molecular contrastive learning of representations via graph neural networks. *Nature Machine Intelligence* **4**, 279–287 (2022).
4. Freeze, J. G., Kelly, H. R. & Batista, V. S. Search for catalysts by inverse design: artificial intelligence, mountain climbers, and alchemists. *Chemical reviews* **119**, 6595–6612 (2019).
5. Gómez-Bombarelli, R. *et al.* Design of efficient molecular organic light-emitting diodes by a high-throughput virtual screening and experimental approach. *Nature materials* **15**, 1120–1127 (2016).
6. Xu, R.-P., Li, Y.-Q. & Tang, J.-X. Recent advances in flexible organic light-emitting diodes. *Journal of Materials Chemistry C* **4**, 9116–9142 (2016).
7. Polishchuk, P. G., Madzhidov, T. I. & Varnek, A. Estimation of the size of drug-like chemical space based on gdb-17 data. *Journal of computer-aided molecular design* **27**, 675–679 (2013).
8. Butler, K. T., Davies, D. W., Cartwright, H., Isayev, O. & Walsh, A. Machine learning for molecular and materials science. *Nature* **559**, 547–555 (2018).
9. Vamathevan, J. *et al.* Applications of machine learning in drug discovery and development. *Nature reviews Drug discovery* **18**, 463–477 (2019).
10. Ekins, S. *et al.* Exploiting machine learning for end-to-end drug discovery and development. *Nature materials* **18**, 435–441 (2019).
11. von Lilienfeld, O. A., Müller, K.-R. & Tkatchenko, A. Exploring chemical compound space with quantum-based machine learning. *Nature Reviews Chemistry* **4**, 347–358 (2020).
12. Westermayr, J., Gastegger, M., Schütt, K. T. & Maurer, R. J. Perspective on integrating machine learning into computational chemistry and materials science. *The Journal of Chemical Physics* **154**, 230903 (2021).
13. Zhang, Z., Liu, Q., Wang, H., Lu, C. & Lee, C.-K. Motif-based graph self-supervised learning for molecular property prediction. *Advances in Neural Information Processing Systems* **34**, 15870–15882 (2021).
14. Ceriotti, M., Clementi, C. & Anatole von Lilienfeld, O. Machine learning meets chemical physics (2021).
15. Keith, J. A. *et al.* Combining machine learning and computational chemistry for predictive insights into chemical systems. *Chemical reviews* **121**, 9816–9872 (2021).
16. Fang, X. *et al.* Geometry-enhanced molecular representation learning for property prediction. *Nature Machine Intelligence* **4**, 127–134 (2022).

- 327 **17.** Wang, D. *et al.* Efficient sampling of high-dimensional free energy landscapes using adaptive reinforced dynamics. *Nature*  
328 *Computational Science* **2**, 20–29 (2022).
- 329 **18.** Madani, A. *et al.* Large language models generate functional protein sequences across diverse families. *Nature Biotechnol-*  
330 *ogy* **1–8** (2023).
- 331 **19.** Kusner, M. J., Paige, B. & Hernández-Lobato, J. M. Grammar variational autoencoder. In *International conference on*  
332 *machine learning*, 1945–1954 (PMLR, 2017).
- 333 **20.** Gómez-Bombarelli, R. *et al.* Automatic chemical design using a data-driven continuous representation of molecules. *ACS*  
334 *central science* **4**, 268–276 (2018).
- 335 **21.** You, J., Liu, B., Ying, Z., Pande, V. & Leskovec, J. Graph convolutional policy network for goal-directed molecular graph  
336 generation. In *Advances in neural information processing systems*, 6410–6421 (2018).
- 337 **22.** Griffiths, R.-R. & Hernández-Lobato, J. M. Constrained bayesian optimization for automatic chemical design using  
338 variational autoencoders. *Chemical science* **11**, 577–586 (2020).
- 339 **23.** Shi, C. *et al.* Graphaf: a flow-based autoregressive model for molecular graph generation. *International Conference on*  
340 *Learning Representations* (2020).
- 341 **24.** Gebauer, N., Gastegger, M. & Schütt, K. Symmetry-adapted generation of 3d point sets for the targeted discovery of  
342 molecules. In *Advances in Neural Information Processing Systems*, 7566–7578 (2019).
- 343 **25.** Wang, J. *et al.* Multi-constraint molecular generation based on conditional transformer, knowledge distillation and  
344 reinforcement learning. *Nature Machine Intelligence* **3**, 914–922 (2021).
- 345 **26.** Gebauer, N. W., Gastegger, M., Hessmann, S. S., Müller, K.-R. & Schütt, K. T. Inverse design of 3d molecular structures  
346 with conditional generative neural networks. *Nature communications* **13**, 1–11 (2022).
- 347 **27.** Zhang, Z., Min, Y., Zheng, S. & Liu, Q. Molecule generation for target protein binding with structural motifs. In *The*  
348 *Eleventh International Conference on Learning Representations* (2022).
- 349 **28.** Zhang, Z. & Liu, Q. Learning subpocket prototypes for generalizable structure-based drug design. *ICML* (2023).
- 350 **29.** Ma, T., Chen, J. & Xiao, C. Constrained generation of semantically valid graphs via regularizing variational autoencoders.  
351 *Advances in Neural Information Processing Systems* **31** (2018).
- 352 **30.** De Cao, N. & Kipf, T. Molgan: An implicit generative model for small molecular graphs. *ICML 2018 workshop on*  
353 *Theoretical Foundations and Applications of Deep Generative Models* (2018).
- 354 **31.** Zang, C. & Wang, F. Moflow: an invertible flow model for generating molecular graphs. In *Proceedings of the 26th ACM*  
355 *SIGKDD International Conference on Knowledge Discovery & Data Mining*, 617–626 (2020).
- 356 **32.** Madhawa, K., Ishiguro, K., Nakago, K. & Abe, M. Graphnvp: An invertible flow model for generating molecular graphs.  
357 *arXiv preprint arXiv:1905.11600* (2019).
- 358 **33.** Luo, Y., Yan, K. & Ji, S. Graphdf: A discrete flow model for molecular graph generation. In *International Conference on*  
359 *Machine Learning*, 7192–7203 (PMLR, 2021).
- 360 **34.** Jin, W., Barzilay, R. & Jaakkola, T. Junction tree variational autoencoder for molecular graph generation. In *International*  
361 *conference on machine learning*, 2323–2332 (PMLR, 2018).
- 362 **35.** Jin, W., Barzilay, R. & Jaakkola, T. Hierarchical generation of molecular graphs using structural motifs. In *ICML*,  
363 4839–4848 (PMLR, 2020).
- 364 **36.** Ganea, O. *et al.* Geomol: Torsional geometric generation of molecular 3d conformer ensembles. *Advances in Neural*  
365 *Information Processing Systems* **34** (2021).
- 366 **37.** Xu, M. *et al.* An end-to-end framework for molecular conformation generation via bilevel programming. In *International*  
367 *Conference on Machine Learning*, 11537–11547 (PMLR, 2021).
- 368 **38.** Shi, C., Luo, S., Xu, M. & Tang, J. Learning gradient fields for molecular conformation generation. In *International*  
369 *Conference on Machine Learning*, 9558–9568 (PMLR, 2021).
- 370 **39.** Liu, S. *et al.* Pre-training molecular graph representation with 3d geometry. *International Conference on Learning*  
371 *Representations* (2022).
- 372 **40.** Mahmood, O., Mansimov, E., Bonneau, R. & Cho, K. Masked graph modeling for molecule generation. *Nature*  
373 *communications* **12**, 1–12 (2021).
- 374 **41.** Hoffmann, M. & Noé, F. Generating valid euclidean distance matrices. *arXiv preprint arXiv:1910.03131* (2019).



- 375 **42.** Hoogeboom, E., Satorras, V. G., Vignac, C. & Welling, M. Equivariant diffusion for molecule generation in 3d. *International*  
376 *Conference on Machine Learning* (2022).
- 377 **43.** Luo, Y. & Ji, S. An autoregressive flow model for 3d molecular geometry generation from scratch. In *International*  
378 *Conference on Learning Representations* (2021).
- 379 **44.** Luo, S., Guan, J., Ma, J. & Peng, J. A 3d generative model for structure-based drug design. *Advances in Neural Information*  
380 *Processing Systems* **34** (2021).
- 381 **45.** Méndez-Lucio, O., Ahmad, M., del Rio-Chanona, E. A. & Wegner, J. K. A geometric deep learning approach to predict  
382 binding conformations of bioactive molecules. *Nature Machine Intelligence* **3**, 1033–1039 (2021).
- 383 **46.** Liu, M., Luo, Y., Uchino, K., Maruhashi, K. & Ji, S. Generating 3d molecules for target protein binding. *International*  
384 *Conference on Machine Learning* (2022).
- 385 **47.** Peng, X. *et al.* Pocket2mol: Efficient molecular sampling based on 3d protein pockets. *International Conference on*  
386 *Machine Learning* (2022).
- 387 **48.** Vignac, C., Osman, N., Toni, L. & Frossard, P. Midi: Mixed graph and 3d denoising diffusion for molecule generation.  
388 *arXiv preprint arXiv:2302.09048* (2023).
- 389 **49.** Liu, Y. *et al.* Spherical message passing for 3d graph networks. *International Conference on Learning Representations*  
390 (2022).
- 391 **50.** Satorras, V. G., Hoogeboom, E., Fuchs, F. B., Posner, I. & Welling, M. E (n) equivariant normalizing flows. *NeurIPS*  
392 (2021).
- 393 **51.** Grosnit, A. *et al.* High-dimensional bayesian optimisation with variational autoencoders and deep metric learning. *arXiv*  
394 *preprint arXiv:2106.03609* (2021).
- 395 **52.** Notin, P., Hernández-Lobato, J. M. & Gal, Y. Improving black-box optimization in vae latent space using decoder  
396 uncertainty. *Advances in Neural Information Processing Systems* **34**, 802–814 (2021).
- 397 **53.** Maus, N. *et al.* Local latent space bayesian optimization over structured inputs. *Advances in Neural Information Processing*  
398 *Systems* **35**, 34505–34518 (2022).
- 399 **54.** Maus, N., Wu, K., Eriksson, D. & Gardner, J. Discovering many diverse solutions with bayesian optimization. *arXiv*  
400 *preprint arXiv:2210.10953* (2022).
- 401 **55.** Papamakarios, G., Nalisnick, E., Rezende, D. J., Mohamed, S. & Lakshminarayanan, B. Normalizing flows for probabilistic  
402 modeling and inference. *Journal of Machine Learning Research* **22**, 1–64 (2021).
- 403 **56.** Dinh, L., Krueger, D. & Bengio, Y. Nice: Non-linear independent components estimation. *arXiv preprint arXiv:1410.8516*  
404 (2014).
- 405 **57.** Dinh, L., Sohl-Dickstein, J. & Bengio, S. Density estimation using real nvp. *arXiv preprint arXiv:1605.08803* (2016).
- 406 **58.** O’Boyle, N. M. *et al.* Open babel: An open chemical toolbox. *Journal of cheminformatics* **3**, 1–14 (2011).
- 407 **59.** Kim, Y. & Kim, W. Y. Universal structure conversion method for organic molecules: from atomic connectivity to  
408 three-dimensional geometry. *Bulletin of the Korean Chemical Society* **36**, 1769–1777 (2015).
- 409 **60.** Garcia Satorras, V., Hoogeboom, E., Fuchs, F., Posner, I. & Welling, M. E (n) equivariant normalizing flows. *Advances in*  
410 *Neural Information Processing Systems* **34** (2021).
- 411 **61.** Ramakrishnan, R., Dral, P. O., Rupp, M. & Von Lilienfeld, O. A. Quantum chemistry structures and properties of 134 kilo  
412 molecules. *Scientific data* **1**, 1–7 (2014).
- 413 **62.** Sun, Q. *et al.* Pyscf: the python-based simulations of chemistry framework. *Wiley Interdisciplinary Reviews: Computational*  
414 *Molecular Science* **8**, e1340 (2018).
- 415 **63.** Sun, Q. *et al.* Recent developments in the pyscf program package. *The Journal of chemical physics* **153**, 024109 (2020).
- 416 **64.** Anderson, A. C. The process of structure-based drug design. *Chemistry & biology* **10**, 787–797 (2003).
- 417 **65.** Tripathi, A. & Bankaitis, V. A. Molecular docking: from lock and key to combination lock. *Journal of molecular medicine*  
418 *and clinical applications* **2** (2017).
- 419 **66.** Alon, A. *et al.* Structures of the  $\sigma_2$  receptor enable docking for bioactive ligand discovery. *Nature* **600**, 759–764 (2021).
- 420 **67.** Francoeur, P. G. *et al.* Three-dimensional convolutional neural networks and a cross-docked data set for structure-based  
421 drug design. *Journal of chemical information and modeling* **60**, 4200–4215 (2020).

- 422 **68.** Bickerton, G. R., Paolini, G. V., Besnard, J., Muresan, S. & Hopkins, A. L. Quantifying the chemical beauty of drugs.  
423 *Nature chemistry* **4**, 90–98 (2012).
- 424 **69.** Trott, O. & Olson, A. J. Autodock vina: improving the speed and accuracy of docking with a new scoring function, efficient  
425 optimization, and multithreading. *Journal of computational chemistry* **31**, 455–461 (2010).
- 426 **70.** Alhossary, A., Handoko, S. D., Mu, Y. & Kwoh, C.-K. Fast, accurate, and reliable molecular docking with quickvina 2.  
427 *Bioinformatics* **31**, 2214–2216 (2015).
- 428 **71.** Landrum, G. *et al.* Rdkit: A software suite for cheminformatics, computational chemistry, and predictive modeling. *Greg  
429 Landrum* **8** (2013).
- 430 **72.** Bento, A. P. *et al.* An open source chemical structure curation pipeline using rdkit. *Journal of Cheminformatics* **12**, 1–16  
431 (2020).
- 432 **73.** Rappé, A. K., Casewit, C. J., Colwell, K., Goddard III, W. A. & Skiff, W. M. Uff, a full periodic table force field for  
433 molecular mechanics and molecular dynamics simulations. *Journal of the American chemical society* **114**, 10024–10035  
434 (1992).
- 435 **74.** Ragoza, M., Masuda, T. & Koes, D. R. Generating 3d molecules conditional on receptor binding sites with deep generative  
436 models. *Chemical science* **13**, 2701–2713 (2022).
- 437 **75.** Axelrod, S. & Gomez-Bombarelli, R. Geom, energy-annotated molecular conformations for property prediction and  
438 molecular generation. *Scientific Data* **9**, 1–14 (2022).
- 439 **76.** Peng, X., Guan, J., Liu, Q. & Ma, J. Moldiff: Addressing the atom-bond inconsistency problem in 3d molecule diffusion  
440 generation. *arXiv preprint arXiv:2305.07508* (2023).
- 441 **77.** Steinegger, M. & Söding, J. Mmseqs2 enables sensitive protein sequence searching for the analysis of massive data sets.  
442 *Nature biotechnology* **35**, 1026–1028 (2017).
- 443 **78.** Simm, G., Pinsler, R. & Hernández-Lobato, J. M. Reinforcement learning for molecular design guided by quantum  
444 mechanics. In *International Conference on Machine Learning*, 8959–8969 (PMLR, 2020).
- 445 **79.** Vaswani, A. *et al.* Attention is all you need. *Advances in neural information processing systems* **30** (2017).
- 446 **80.** Kingma, D. P. & Ba, J. Adam: A method for stochastic optimization. *arXiv preprint arXiv:1412.6980* (2014).
- 447 **81.** Cowen-Rivers, A. I. *et al.* Hebo: pushing the limits of sample-efficient hyper-parameter optimisation. *Journal of Artificial  
448 Intelligence Research* **74**, 1269–1349 (2022).
- 449 **82.** Ghose, A. K., Viswanadhan, V. N. & Wendoloski, J. J. A knowledge-based approach in designing combinatorial or  
450 medicinal chemistry libraries for drug discovery. 1. a qualitative and quantitative characterization of known drug databases.  
451 *Journal of combinatorial chemistry* **1**, 55–68 (1999).
- 452 **83.** Lipinski, C. A., Lombardo, F., Dominy, B. W. & Feeney, P. J. Experimental and computational approaches to estimate  
453 solubility and permeability in drug discovery and development settings. *Advanced drug delivery reviews* **64**, 4–17 (2012).
- 454 **84.** Bajusz, D., Rácz, A. & Héberger, K. Why is tanimoto index an appropriate choice for fingerprint-based similarity  
455 calculations? *Journal of cheminformatics* **7**, 1–13 (2015).
- 456 **85.** Xu, M. *et al.* Geodiff: A geometric diffusion model for molecular conformation generation. *ICLR* (2022).
- 457 **86.** Halgren, T. A. Merck molecular force field. v. extension of mmff94 using experimental data, additional computational data,  
458 and empirical rules. *Journal of Computational Chemistry* **17**, 616–641 (1996).
- 459 **87.** Schütt, K. *et al.* Schnet: A continuous-filter convolutional neural network for modeling quantum interactions. In *Advances  
460 in neural information processing systems*, 991–1001 (2017).
- 461 **88.** Schutt, K. *et al.* Schnetpack: A deep learning toolbox for atomistic systems. *Journal of chemical theory and computation*  
462 **15**, 448–455 (2018).
